# Supplementary material for: Genetic evidence for contribution of human dispersal to the genetic diversity of EBA-175 in Plasmodium falciparum
Source: Springer Nature journal article supplement (doi:10.1186/s12936-015-0820-2), 2015-07-31
Supplement: MOESM1 [file 9761510]

*Plasmodium reichenowi*

10.01

AF258781

**Asian Cluster**

dd2, W2, Th07, Th09, TH11, Th18, Th26, Th27, Th36, Th48, Th58, Th80, Th98, C5, C4

Th97, F5, C754, C568, C309, C182, C176, C031, C444, C425, C404, C325, C229, C226, C171, C057, NIG34, ItDR, HB3, DIV30, 7G8, U78725, NIG203, NIG199, NIG198, NIG193, NIG192, NIG167, NIG163, NIG157, NIG140, NIG113, NIG109, NIG101, NIG66, NIG52, NIG39, camp, div30-1, hb3-1, 7g8-1, 456, 418, X52524

F20, F14, C405, C417, C426, C443, C067, C457, AL844506, PFAERCBA, XM\_001349171, AF406762, NC\_004328, U3220, 106\_10, FCB, 105, U78724, NIG185, NIG195, NIG210, NIG196, NIG160, NIG162, NIG171, NIG170, NIG132, NIG146, NIG151, NIG149, 3d7, fcr3, NIG112, NIG105, fab9, 224, 123\_5, kmvii, fab6, m190, 128\_4, 425, 102\_1, m24, s35, k39, C346, C356, C338, C304, C256, C282, C298, C289, VI-S, C007, C157, C066, FVO, PNG1, 436, T2\_C6, C372, C375, Th08, Th10, Th04, Th01, C843, C619, C244, C725, C323, C100, Th13, Th16, Th17, Th19, Th21, Th22, Th23, Th24, Th25, Th30, Th34, Th40, Th42, Th43, Th50, Th54, Th55, Th56, Th65, Th71, Th72, Th74, Th83, Th85, Th86, Th89, Th91, Th93, Th94, Th95, Th99, Th100, C8, C9, C10, F3, F9, F10
